# Supplementary material for: Hidden Costs Associated with Smallholder Family-Based Broiler Production: Accounting for the Intangibles
Source: MDPI journal article supplement (doi:10.3390/su152215780), 2023-11-09
Supplement: s1 [file s1]

Table S1. Economic cost calculation models

(The model followed according to Nascimento, R.A., Luiz, V.T., Mendes, C.M.I., Giannetti, B.F., Gameiro, A.H., 2022. Sustainability comparison of commercial Brazilian organic and conventional broiler production systems under a 5SEnSU model perspective. J. Clean. Prod. 377. <https://doi.org/10.1016/j.jclepro.2022.134297>)

| Notes | Items                                  | Data   | Units                | References          |
|-------|----------------------------------------|--------|----------------------|---------------------|
| $Q_1$ | <i>Zootechnical information</i>        |        |                      |                     |
|       | Water consumption=                     | 35.58  | m <sup>3</sup>       | Own data **         |
|       | Initial weight =                       | 0.042  | kg                   | Own data            |
|       | Final weight =                         | 2,650  | kg                   | Miele et al. (2010) |
|       | Final age =                            | 42     | d                    | Miele et al. (2010) |
|       | Flock =                                | 6.27   | un/yr                | Miele et al. (2010) |
|       | Interval =                             | 16     | d                    | Own data            |
|       | Bedding reuse =                        | 6      | times                | Miele et al. (2010) |
|       | Maximum density =                      | 13     | birds/m <sup>2</sup> | Own data            |
| $IB$  | Starting number of birds =             | 16,000 | un/flock             | Miele et al. (2010) |
|       | Price paid per broiler =               | 0.88   | R\$/bird             | Own data            |
|       | <i>Mortality</i>                       |        |                      |                     |
| $M1$  | Initial mortality =                    | -      | %                    | Own data            |
| $M2$  | Growth mortality =                     | -      | %                    | Own data            |
| $M3$  | Final mortality =                      | 4      | %                    | Miele et al. (2010) |
|       | Mortality = ( $M1$ )+( $M2$ )+( $M3$ ) |        |                      |                     |
|       | (__%)+(__%)+(__%)                      |        |                      |                     |
|       | =                                      | 4      | %                    | Parameter           |

|                       |                                                                                                                                                                             |                                                                                  |
|-----------------------|-----------------------------------------------------------------------------------------------------------------------------------------------------------------------------|----------------------------------------------------------------------------------|
| <i>SBr</i>            | <p>Total of broilers = <math>(IB) \cdot 1 - (\text{Mortality})</math></p> <p>= <math>(\text{__un/flock}) \cdot 1 - (\text{__}\%)</math></p> <p>= 15,360 un/flock</p>        | Parameter                                                                        |
|                       | <p>Body weight gain= <math>(\text{Final weight}) - (\text{Initial weight})</math></p> <p>= <math>(\text{__kg/bird}) - (\text{__kg/bird})</math></p> <p>= 2,61 kg/bird</p>   | Parameter                                                                        |
|                       | <p><i>Feed consumption</i></p> <p>Initial feed consumption = 1.149 kg/bird</p> <p>Growth feed consumption = 1.985 kg/bird</p> <p>Final feed consumption = 1.510 kg/bird</p> | <p>Miele et al. (2010)</p> <p>Miele et al. (2010)</p> <p>Miele et al. (2010)</p> |
|                       | Total initial feed consumption =                                                                                                                                            |                                                                                  |
| <i>IFi</i>            | <p>= <math>(\text{Initial consumption}) \cdot (IB) \cdot (1 - (M1))</math></p> <p>= <math>(\text{__kg/bird}) \cdot (\text{__un/flock}) \cdot (1 - (\text{__}\%))</math></p> |                                                                                  |
|                       | Total growth feed consumption = 16,847.10 kg                                                                                                                                | Parameter                                                                        |
| <i>GFi</i>            | <p>= <math>(\text{Consumption growth}) \cdot (IB) \cdot (1 - (M2))</math></p> <p>= <math>(\text{__kg/bird}) \cdot (\text{__un/flock}) \cdot (1 - (\text{__}\%))</math></p>  |                                                                                  |
|                       | Total final feed consumption = 29,025.46 kg                                                                                                                                 | Parameter                                                                        |
| <i>FFi</i>            | <p>= <math>(\text{Final consumption}) \cdot (IB) \cdot (1 - (M3))</math></p> <p>= <math>(\text{__kg/bird}) \cdot (\text{__un/flock}) \cdot (1 - (\text{__}\%))</math></p>   |                                                                                  |
|                       | Total feed consumption = 21,990.43 kg                                                                                                                                       | Parameter                                                                        |
| <i>Fi</i>             | <p>= <math>(IFi) + (GFi) + (FFi)</math></p> <p>= <math>(\text{__kg/bird}) + (\text{__kg/bird}) + (\text{__kg/bird})</math></p> <p>= 67,862.99 kg</p>                        | Parameter                                                                        |
| <i>Q<sub>2</sub></i>  | <i>Depreciation and maintenance cost</i>                                                                                                                                    |                                                                                  |
| <i>it<sub>1</sub></i> | <p><i>Building</i></p> <p>Building area = 1,200 m<sup>2</sup></p> <p>Basic Unit Cost (CUB/SP) = 417.78 R\$/m<sup>2</sup></p>                                                | <p>Own data</p> <p>SINDUSCON-SP, 2007</p>                                        |

|                    |                                                     |                     |   |
|--------------------|-----------------------------------------------------|---------------------|---|
| Initial value =    | (Area)*(CUB)                                        |                     |   |
| =                  | (__m^2) *(__R\$/m^2)                                |                     |   |
| =                  | 501,336.00 R\$                                      | Parameter           |   |
| Residual rate =    | 7.6 %                                               | Miele et al. (2010) |   |
| Useful life =      | 40 yr                                               | CONAB, 2010 p. 57   | b |
| Residual value =   | (Initial value) * (Residual rate)                   |                     |   |
| =                  | (__R\$) * (__%)                                     |                     |   |
| =                  | 38,101.54 R\$                                       | Parameter           |   |
| Depreciation =     | (Initial value) - (Residual value) / (Useful life)  |                     |   |
| =                  | (__R\$) - (__R\$) / (__year)                        |                     |   |
| =                  | 11,580.86 R\$/year                                  | Parameter           |   |
| Maintenance rate = | 1 %                                                 | Miele et al. (2010) |   |
| Maintenance cost = | (Initial value) *(Maintenance rate) / (Useful life) |                     |   |
| =                  | (__R\$) * (__%) / (__year)                          |                     |   |
| =                  | 125.33 R\$/year                                     | Parameter           |   |

$it_3$

### Equipment

|                    |                                                     |                     |   |
|--------------------|-----------------------------------------------------|---------------------|---|
| Initial value =    | 245,654.64 R\$                                      | Own data            |   |
| Residual rate =    | 5.6 %                                               | Miele et al. (2010) | a |
| Useful life =      | 12 yr                                               | CONAB, 2010 p. 52-7 | a |
| Residual value =   | ( Initial value ) * (Residual rate)                 |                     |   |
| =                  | (__R\$) * (__%)                                     |                     |   |
| =                  | 13,756.66 R\$                                       | Parameter           |   |
| Depreciation =     | (Initial value) - (Residual value) / (Useful life)  |                     |   |
| =                  | (__R\$) - (__R\$) / (__year)                        |                     |   |
| =                  | 19,324.83 R\$/year                                  | Parameter           |   |
| Maintenance rate = | 1 %                                                 | Own data            |   |
| Maintenance cost = | (Initial value) *(Maintenance rate) / (Useful life) |                     |   |
| =                  | (__R\$)(__%) / (__year)                             |                     |   |
| =                  | 204.71 R\$/yr                                       | Parameter           |   |

|             |                            |                                                                               |           |              |
|-------------|----------------------------|-------------------------------------------------------------------------------|-----------|--------------|
| $Q_{2a}$    | <i>Depreciation</i>        | Total depreciation cost = $\sum_{i=1}^3 (\text{Depreciation } it_{1...3})$    |           |              |
|             |                            | = $\sum_{i=1}^3 (\text{__R\$/year})$                                          |           |              |
|             |                            | = 30,905.69 R\$/year                                                          | Parameter |              |
|             |                            | Total depreciation cost per batch = $(Q_{2a}) / (\text{Flock})$               |           |              |
|             |                            | = $(\text{__R\$/year}) / (\text{__flocks/year})$                              |           |              |
| $Q_{2b}$    | <i>Maintenance</i>         | = 4,929.14 R\$/flocks                                                         | Parameter |              |
|             |                            | Total maintenance cost = $\sum_{i=1}^3 (\text{Maintenance cost } it_{1...3})$ |           |              |
|             |                            | = $\sum_{i=1}^3 (\text{__R\$/year})$                                          |           |              |
|             |                            | = 330.05 R\$/year                                                             | Parameter |              |
|             |                            | = $(Q_{2b}) / (\text{flock})$                                                 |           |              |
|             |                            | = $(\text{__R\$/year}) / (\text{__flock/year})$                               |           |              |
|             |                            | = 52.64 R\$/flock                                                             | Parameter |              |
|             |                            | Fixed capital = $\sum (\text{Initial value } it_{1...3}) +$                   |           |              |
|             |                            | (Building)                                                                    |           |              |
|             |                            | = $(\sum_{i=1}^3 (\text{__R\$})) +$                                           |           |              |
|             |                            | (__R\$) + (__R\$)                                                             |           |              |
|             |                            | = 746,990.64 R\$                                                              | Parameter |              |
| $Q_3$       | <i>Manpower cost</i>       |                                                                               |           |              |
| $Q_{3a}$    | <i>Registered manpower</i> | Price paid per broiler = 0.88 R\$/bird                                        | Own data  |              |
|             |                            | Total of broilers = 15,360 birds                                              |           |              |
|             |                            | Payment per flock = (Total of broilers)*(Price paid)                          |           | <sup>c</sup> |
| $P_{flock}$ |                            | = $(\text{__un}) * (\text{__R\$/bird})$                                       |           |              |
|             |                            | = 13,516.80 R\$/flock                                                         |           |              |
|             |                            | Wage                                                                          |           | <sup>d</sup> |

|          |                                   |                                                                                                              |                   |
|----------|-----------------------------------|--------------------------------------------------------------------------------------------------------------|-------------------|
|          | Number of employees =             | 1 un                                                                                                         | Own data          |
|          | Wage (pro-labore) =               | 1,500.00 R\$/flock                                                                                           | Own data          |
|          | Registered manpower =             | $\sum_{i=2}^1 (P_{flock}; \text{Registered manpower})$                                                       |                   |
|          |                                   | $\sum_{i=2}^1 (\text{__R\$/flock}); (\text{__R\$/flock})$                                                    |                   |
|          | =                                 | 15,016.80 R\$/flock                                                                                          | Parameter         |
| $Q_{3b}$ | <i>Catching services</i>          |                                                                                                              |                   |
|          | Catching service =                | 0.08 R\$/bird                                                                                                | Own data          |
|          | Total of broilers =               | 15,360 birds                                                                                                 | see $Q_1$ ; $SBr$ |
|          | Catching service cost =           | (Total of broilers)*(Catching service)                                                                       |                   |
|          | =                                 | (__birds)*(__R\$/bird)                                                                                       |                   |
|          | =                                 | 1,228.80 R\$/flock                                                                                           | Parameter         |
| $Q_{3c}$ | <i>Technical assistance</i>       |                                                                                                              |                   |
|          | Wage =                            | 3,577.50 R\$/month                                                                                           | Own data          |
|          | Number of visits =                | 3 times/week                                                                                                 | Own data          |
|          | Time spent =                      | 2 hr/visit                                                                                                   | Own data          |
|          | Worked hours =                    | 160 hr/month                                                                                                 |                   |
|          | Flocks =                          | 6.27 flocks/year                                                                                             |                   |
|          | Months per year =                 | 12 months                                                                                                    |                   |
|          | Technical assistance cost (TAc) = | $((\text{Wage}) * (\text{Visits}) * (\text{Time spent}) / (\text{Hours})) (12) / (\text{Flocks})$            |                   |
|          |                                   | $((\text{__R\$/month}) * (\text{__times/month}) * (\text{__hr/visit}) / (160)) (12) / (\text{__flocks /yr})$ |                   |
|          | =                                 | 256.76 R\$/flock                                                                                             | Parameter         |
|          | Manpower cost =                   | $(Q_{3a}) + (Q_{3b}) + (Q_{3c})$                                                                             |                   |
|          | =                                 | (__R\$/flock) + (__R\$/flock) + (__R\$/flock)                                                                |                   |
|          | =                                 | 16,502.36 R\$/flock                                                                                          | Parameter         |

|       |                |                               |                                         |                     |
|-------|----------------|-------------------------------|-----------------------------------------|---------------------|
| $Q_4$ | One-day chicks |                               |                                         |                     |
|       |                | Purchased chicks =            | 16,000 un/flock                         | Own data            |
|       |                | Price paid per chicks =       | 0.80 R\$/chick                          | Own data            |
|       |                |                               | = (Purchased chicks)*(Price paid)       |                     |
|       |                |                               | = (___un/ flock)*(___R\$/chick)         |                     |
|       |                |                               | = 12,800.00 R\$/flock                   | Parameter           |
| $Q_5$ | Nutrition      |                               |                                         |                     |
|       | Initial phase  |                               |                                         |                     |
| $IFi$ |                | Initial feed consumption =    | 16,847.10 kg                            | Miele et al. (2010) |
|       |                | Corn =                        | 55.64 %                                 | Miele et al. (2010) |
|       |                | Soybean meal 45% =            | 36.00 %                                 | Miele et al. (2010) |
|       |                | Price paid corn =             | 0.58 R\$/kg                             | Own data            |
|       |                | Price paid soybean meal 45% = | 1.25 R\$/kg                             | Own data            |
|       |                | Consumption per ingredient =  | ( $IFi$ ) * (ingredient) * (price paid) |                     |
|       |                |                               | = (___kg) * (___%) * (___R\$/kg)        |                     |
|       |                | Corn =                        | 10,228.86 R\$/phase                     | Parameter           |
|       |                | Soybean meal 45% =            | 6,618.24 R\$/phase                      | Parameter           |
| $NCi$ |                | Initial nutrition cost =      | (Corn)+(Soybean meal 45%)               |                     |
|       |                |                               | = (___ R\$/phase)+(___ R\$/phase)       |                     |
|       |                |                               | = 14,194.30 R\$/phase                   | Parameter           |
|       | Growth phase   |                               |                                         |                     |
| $GFi$ |                | Feed consumption growth =     | 29,025.46 kg                            | Miele et al. (2010) |
|       |                | Corn =                        | 58.19 %                                 | Miele et al. (2010) |
|       |                | Soybean meal 45% =            | 33.20 %                                 | Miele et al. (2010) |
|       |                | Price paid corn =             | 0.58 R\$/kg                             | Own data            |
|       |                | Price paid soybean meal 45% = | 1.25 R\$/kg                             | Own data            |
|       |                | Consumption per ingredient =  | ( $GFi$ ) * (ingredient) * (price paid) |                     |
|       |                |                               | = (___kg) * (___%) * (___R\$/kg)        |                     |

|          |                                  |                                        |                                           |                     |
|----------|----------------------------------|----------------------------------------|-------------------------------------------|---------------------|
| $NCg$    |                                  | Corn =                                 | 18,481.14 R\$/phase                       | Parameter           |
|          |                                  | Soybean meal 45% =                     | 10,544.32 R\$/phase                       | Parameter           |
|          |                                  | Growth nutrition cost =                | (Corn)+(Soybean meal 45%)                 |                     |
|          |                                  | =                                      | (__ R\$/phase)+(__ R\$/phase)             |                     |
|          |                                  | =                                      | 23,876.11 R\$/phase                       | Parameter           |
|          | <i>Final phase</i>               |                                        |                                           |                     |
| $FFi$    |                                  | Final feed consumption =               | 21,990.43                                 | Miele et al. (2010) |
|          |                                  | Corn =                                 | 62.43 %                                   | Miele et al. (2010) |
|          |                                  | Soybean meal 45% =                     | 28.59 %                                   | Miele et al. (2010) |
|          |                                  | Price paid corn =                      | 0.58 R\$/kg                               | Own data            |
|          |                                  | Price paid soybean meal 45% =          | 1.25 R\$/kg                               | Own data            |
|          |                                  | Consumption per ingredient =           | ( $FFi$ ) * (ingredient) * (price paid)   |                     |
|          |                                  |                                        | (__kg) * (__%) * (__R\$/kg)               |                     |
| $NCf$    |                                  | Corn =                                 | 15,083.09 R\$/phase                       | Parameter           |
|          |                                  | Soybean meal 45% =                     | 6,907.34 R\$/phase                        | Parameter           |
|          |                                  | Final stage nutrition cost ( $NCf$ ) = | (Corn)+(Soybean meal 45%)                 |                     |
|          |                                  | =                                      | (__ R\$/phase)+(__ R\$/phase)             |                     |
|          |                                  | =                                      | 21,990.43 R\$/phase                       | Parameter           |
|          |                                  | Total Nutrition Cost (TNC) =           | ( $NCi$ )+( $NCg$ )+( $NCf$ )             |                     |
|          |                                  | =                                      | (__R\$/phase)+(__R\$/phase)+(__R\$/phase) |                     |
|          |                                  | =                                      | 60,973.04 R\$/flock                       | Parameter           |
| $Q_6$    | <i>Health cost</i>               |                                        |                                           |                     |
| $Q_{6a}$ | <i>Cleaning and sanitization</i> |                                        |                                           |                     |
|          |                                  | Sanitizer                              |                                           |                     |
|          |                                  | Purchased =                            | 2.436 kg/flock                            | Own data            |
|          |                                  | Used =                                 | 2.436 kg/flock                            | Own data            |
|          |                                  | Price paid =                           | 27.00 R\$/item                            | Own data            |

$$\begin{aligned}
 \text{Item cost} &= (\text{Used}) * (\text{Price}) / (\text{Purchased}) \\
 &= ( \text{__kg/ flock} ) * ( \text{__R\$/item} ) / ( \text{__kg/ flock} ) \\
 &= 27.00 \text{ R\$/flock}
 \end{aligned}$$

Parameter

*Detergent*

$$\begin{aligned}
 \text{Purchased} &= 1.560 \text{ kg/flock} && \text{Own data} \\
 \text{Used} &= 1.560 \text{ kg/flock} && \text{Own data} \\
 \text{Price paid} &= 27.00 \text{ R\$/item} && \text{Own data} \\
 \text{Item cost} &= (\text{Used}) * (\text{Price}) / (\text{Purchased}) \\
 &= ( \text{__kg/batch} ) * ( \text{__R\$/item} ) / ( \text{__kg/ flock} ) \\
 &= 27.00 \text{ R\$/ flock} && \text{Parameter} \\
 &= (\text{Disinfectant}) + (\text{Detergent}) \\
 &= ( \text{__ R\$/ flock} ) + ( \text{__ R\$/ flock} ) \\
 &= 54.00 \text{ R\$/ flock} && \text{Parameter}
 \end{aligned}$$

***Q<sub>6b</sub>***      *Analysis*

*Water analysis*

***Q<sub>6b1</sub>***

$$\begin{aligned}
 \text{Declared value} &= 0 \text{ R\$/year} && \text{Own data} \\
 \text{Number of flocks/year} &= 0 \text{ flocks/year} && \text{Own data} \\
 \text{Water analysis cost} &= (\text{Declared value}) / (\text{Flocks}) \\
 &= ( \text{__R\$/year} ) / ( \text{__n/year} ) \\
 &= 0 \text{ R\$/batch} && \text{Parameter}
 \end{aligned}$$

***Q<sub>6b2</sub>***      *Salmonella sp analysis.*

$$\begin{aligned}
 \text{Declared value} &= 0 \text{ R\$/batch} && \text{Own data}
 \end{aligned}$$

***Q<sub>6c</sub>***      *Rodent control*

$$\begin{aligned}
 \text{Declared value} &= 0 \text{ R\$/year} && \text{Own data} \\
 \text{Number of flock/year} &= 6.27 \text{ Flocks/year} && \text{Own data} \\
 \text{Rodent control cost} &= (\text{Declared value}) / (\text{Flocks}) \\
 &= ( \text{__R\$/year} ) / ( \text{__un/year} )
 \end{aligned}$$



|                     |                                                                   |              |           |
|---------------------|-------------------------------------------------------------------|--------------|-----------|
|                     | =                                                                 | 0 R\$/flocks | Parameter |
| Analysis cost =     | ( Analysis of <i>Salmonella</i> sp. )+<br>( Water analysis cost ) |              | Parameter |
|                     | = ( __R\$/flock)+( __R\$/flock)                                   |              |           |
| Total health cost = | ( $Q_{6a}$ )+( $Q_{6b}$ )+( $Q_{6c}$ )                            |              |           |
|                     | = ( __R\$/flock)+( __R\$/flock)+( __R\$/flock)                    |              |           |
|                     | = 54.00 R\$/flock                                                 |              | Parameter |

## **$Q_7$ Energetics**

**$It_1$**

|                          |             |           |
|--------------------------|-------------|-----------|
| <i>Diesel</i>            |             |           |
| Quantity =               | 0 L/flock   | Own data  |
| Price paid =             | 0 R\$/L     | Own data  |
| = (Quantity) * (Price)   |             |           |
| = (___L/flock) * (R\$/L) |             |           |
| =                        | 0 R\$/flock | Parameter |

**$It_2$**

|                          |             |           |
|--------------------------|-------------|-----------|
| <i>Gasoline</i>          |             |           |
| Quantity =               | 0 L/flock   | Own data  |
| Price paid =             | 0 R\$/L     | Own data  |
| = (Quantity) * (Price)   |             |           |
| = (___L/flock) * (R\$/L) |             |           |
| =                        | 0 R\$/batch | Parameter |

**$It_3$**

|                                                         |                          |          |
|---------------------------------------------------------|--------------------------|----------|
| <i>Firewood</i>                                         |                          |          |
| Quantity =                                              | 13 m <sup>3</sup> /flock | Own data |
| Price paid =                                            | 90 R\$/m <sup>3</sup>    | Own data |
| = (Quantity) * (Price)                                  |                          |          |
| = ( __m <sup>3</sup> /flock) * ( __R\$/m <sup>3</sup> ) |                          |          |

|          |                                                            |   |                    |           |
|----------|------------------------------------------------------------|---|--------------------|-----------|
|          |                                                            | = | 1,170.00 R\$/flock | Parameter |
| $Q_{7a}$ | <i>Heating</i>                                             |   |                    |           |
|          | Heating cost = ( $It_3$ )                                  |   |                    |           |
|          | (__R\$/batch)                                              |   |                    |           |
|          | =                                                          |   | 1,170.00 R\$/flock | Parameter |
| $Q_{7b}$ | <i>Fuel</i>                                                |   |                    |           |
|          | Fuel cost = ( $It_1$ )+( $It_2$ )                          |   |                    |           |
|          | =                                                          |   | 0 R\$/flock        | Parameter |
| $Q_{7c}$ | <i>Electricity</i>                                         |   |                    |           |
|          | Quantity =                                                 |   | 1,770 kWh/flock    | Own data  |
|          | Price paid =                                               |   | 0.40 R\$/kwh       | Own data  |
|          | = (Quantity) * (Price)                                     |   |                    |           |
|          | (__kwh/flock) * (__R\$/kwh)                                |   |                    |           |
|          | =                                                          |   | 708.00 R\$/batch   | Parameter |
|          | Total energy cost = ( $Q_{7a}$ )+( $Q_{7b}$ )+( $Q_{7c}$ ) |   |                    |           |
|          | = (__R\$/flock)+( __R\$/flock)+( __R\$/flock)              |   |                    |           |
|          | =                                                          |   | 2,502.00 R\$/flock | Parameter |
| $Q_8$    | <i>Bedding</i>                                             |   |                    |           |
|          | Quantity =                                                 |   | 20 t               | Own data  |
|          | Price =                                                    |   | 10.00 R\$/t        | Own data  |
|          | Bedding reuse =                                            |   | 6 times            | Own data  |
|          | Total bedding cost (Lit) = ((Quantity)*(Price))*(Flocks) / |   |                    |           |
|          | (n reuses) / (n reuses)                                    |   |                    |           |
|          | = (__t) * (__R\$/t) * (__un/year) /                        |   |                    |           |
|          | (__times) / (__times)                                      |   |                    |           |

|                                 |                                             |   |                                                |                                                                   |            |
|---------------------------------|---------------------------------------------|---|------------------------------------------------|-------------------------------------------------------------------|------------|
|                                 |                                             | = | 33.33 R\$/flock                                | Parameter                                                         |            |
| <b><i>Q<sub>9</sub></i></b>     | <i>Insurances, certifications and rates</i> |   |                                                |                                                                   | <i>h,i</i> |
| <b><i>Q<sub>9a</sub></i></b>    | <i>Environmental license</i>                |   |                                                |                                                                   |            |
|                                 | Declared value =                            |   | 125.59 R\$/yr                                  | Own data                                                          |            |
| <b><i>Q<sub>9b</sub></i></b>    | <i>Insurance</i>                            |   |                                                |                                                                   |            |
|                                 | Buildings value =                           |   | 501,336.00 R\$                                 | Own data                                                          |            |
|                                 | Rate =                                      |   | 0.36 %                                         | Own data                                                          |            |
|                                 |                                             | = | (Fixed assets) * (Rate)                        |                                                                   |            |
|                                 |                                             | = | 1,804.81 R\$/yr                                |                                                                   |            |
| <b><i>Q<sub>9c</sub></i></b>    |                                             | = | (insurance)+(Environmental license) / (Flocks) |                                                                   |            |
|                                 |                                             | = | (__R\$/yr)+(__R\$/yr) / (__flocks/yr)          |                                                                   |            |
|                                 |                                             | = | 307.88 R\$/flock                               |                                                                   |            |
| <b><i>Q<sub>9d</sub></i></b>    | <i>Funrural</i>                             |   |                                                |                                                                   |            |
|                                 | Declared rate =                             |   | 2.30 %                                         | Own data                                                          |            |
| <b><i>P<sub>flock</sub></i></b> | Flock payment =                             |   | 13,516.80 R\$/flock                            | see <b><i>Q<sub>3</sub></i></b> ; <b><i>P<sub>flock</sub></i></b> |            |
|                                 |                                             | = | ( <b><i>P<sub>flock</sub></i></b> )(Rate)      |                                                                   |            |
|                                 |                                             | = | (__R\$/flock)(__%)                             |                                                                   |            |
|                                 |                                             | = | 310.89 R\$/flock                               | Parameter                                                         |            |
| <b><i>Q<sub>10</sub></i></b>    | <i>Transport cost</i>                       |   |                                                |                                                                   |            |
| <b><i>Q<sub>10a</sub></i></b>   | <i>Transport Farm - Agroindustry</i>        |   |                                                |                                                                   |            |
|                                 | Declared value =                            |   | 0.23 R\$/bird                                  | Own data                                                          |            |
|                                 | Number of birds delivered =                 |   | 15,360 birds                                   | see <b><i>Q<sub>1</sub></i></b> ; <b><i>SBr</i></b>               |            |
|                                 |                                             | = | (Declared value)* (N birds)                    |                                                                   |            |
|                                 |                                             | = | (__R\$/bird)*(__un/flock)                      |                                                                   |            |

|                             |                                   |                                                                 |                     |                                                       |
|-----------------------------|-----------------------------------|-----------------------------------------------------------------|---------------------|-------------------------------------------------------|
|                             |                                   | =                                                               | 3,548.16 R\$/flock  | Parameter                                             |
| <b><math>Q_{10b}</math></b> | <b><i>Feed transport</i></b>      |                                                                 |                     |                                                       |
|                             | Declared value =                  |                                                                 | 0.04 R\$/kg feed    | Own data                                              |
| <b><math>F_1</math></b>     | Starter feed consumption =        |                                                                 | 1.149 kg/bird       | Own data                                              |
| <b><math>F_2</math></b>     | Feed consumption growth =         |                                                                 | 1.985 kg/bird       | Own data                                              |
| <b><math>F_3</math></b>     | Final feed consumption =          |                                                                 | 1.510 kg/bird       | Own data                                              |
| <b><math>SBr</math></b>     | Number of chickens delivered =    |                                                                 | 15,360 un/flock     | see <b><math>Q_1</math></b> ; <b><math>SBr</math></b> |
|                             | Total feed consumption =          | $\sum(i=3)^1( F_{1...3})*( SBr)$                                |                     |                                                       |
|                             |                                   | = $\sum(i=3)^1( \_\text{kg/bird.flock} )*( \_\text{un/flock})$  |                     |                                                       |
|                             |                                   | =                                                               | 2,567.95 kg/flock   | Parameter                                             |
|                             |                                   | = (Declared value) *(Feed consumption)                          |                     |                                                       |
|                             |                                   | = ( \_\text{R\$/kg feed} )*( \_\text{kg/batch} )                |                     |                                                       |
|                             |                                   | =                                                               | 3,409.79 R\$/flock  | Parameter                                             |
|                             | Transport cost =                  | ( <b><math>Q_{10a}</math></b> )+( <b><math>Q_{10b}</math></b> ) |                     |                                                       |
|                             |                                   | = ( \_\text{R\$/flock} )+( \_\text{R\$/flock} )                 |                     |                                                       |
|                             |                                   | =                                                               | 6,116.11 R\$/flock  |                                                       |
| <b><math>Q_{11}</math></b>  | <b><i>Miscellaneous costs</i></b> |                                                                 |                     |                                                       |
| <b><math>EMr</math></b>     | Estimated eventual rate (EMr) =   |                                                                 | 3 %                 | Miele et al. 2010                                     |
| <b><math>Q_{6a}</math></b>  | Cleaning and sanitization =       |                                                                 | 54.00 R\$/flock     | Parameter                                             |
| <b><math>Q_{3c}</math></b>  | Technical assistance =            |                                                                 | 256.76 R\$/flock    | Parameter                                             |
| <b><math>Q_{10}</math></b>  | Transport =                       |                                                                 | 6,116.11 R\$/flock  | Parameter                                             |
| <b><math>Q_4</math></b>     | Day-old chicks =                  |                                                                 | 12,800.00 R\$/flock | Parameter                                             |
| <b><math>Q_5</math></b>     | Nutrition =                       |                                                                 | 60,973.04 R\$/flock | Parameter                                             |
| <b><math>Q_{6b}</math></b>  | Analysis =                        |                                                                 | 0 R\$/flock         | Parameter                                             |
| <b><math>Q_7</math></b>     | Energetics=                       |                                                                 | 2,502.00 R\$/flock  | Parameter                                             |
| <b><math>Q_8</math></b>     | Bedding =                         |                                                                 | 33.33 R\$/flock     | Parameter                                             |

|           |                                   |                                                                                                                                                                                                                                                                        |            |
|-----------|-----------------------------------|------------------------------------------------------------------------------------------------------------------------------------------------------------------------------------------------------------------------------------------------------------------------|------------|
| $Q_{11a}$ | Miscellaneous cost - Producer     | $= \sum_{i=3}^1 (Q_{6a,7,8}) * (EMr)$ $= \sum_{i=3}^1 ( \_\_\text{R\$/flock} ) * ( \_\_\% )$ $= 77.68 \text{ R\$/flock}$                                                                                                                                               | Parameter  |
| $Q_{11b}$ | Miscellaneous cost - Agribusiness | $= \sum_{i=5}^1 (Q_{3c,4,5,6b,10}) * (EMr)$ $= \sum_{i=5}^1 ( \_\_\text{R\$/flock} ) * ( \_\_\% )$ $= 2,404.38 \text{ R\$/flock}$                                                                                                                                      | Parameter  |
|           | Total miscellaneous cost          | $= (Q_{11a}) + (Q_{11b})$ $= ( \_\_\text{R\$/batch} ) + ( \_\_\text{R\$/flock} )$ $= 2,482.06 \text{ R\$/flock}$                                                                                                                                                       | Parameter  |
| $Q_{12}$  | <i>Production factor costs</i>    |                                                                                                                                                                                                                                                                        |            |
| $Q_{12a}$ | <i>Land factor cost</i>           |                                                                                                                                                                                                                                                                        |            |
|           | Flock                             | 6.27 flocks/year                                                                                                                                                                                                                                                       | Own data   |
|           | Land price                        | 0.00 R\$/m <sup>2</sup>                                                                                                                                                                                                                                                | Own data   |
|           | Area                              | 1,200 m <sup>2</sup>                                                                                                                                                                                                                                                   | Own data   |
|           | Interest rate                     | 6.00 %yr                                                                                                                                                                                                                                                               | SELIC rate |
|           | IGP-DI Index                      | 2.22 %                                                                                                                                                                                                                                                                 | Own data   |
|           | Land factor cost                  | $= (\text{Land price}) * (\text{Area}) * (\text{Rate}) -$ $(\text{Land price}) * (\text{Area}) * (\text{IGP-DI})$ $= ( \_\_\text{R\$/m}^2 ) * ( \_\_\text{m}^2 ) * ( \_\_\% ) -$ $( \_\_\text{R\$/m}^2 ) * ( \_\_\text{m}^2 ) * ( \_\_\% )$ $= 0.00 \text{ R\$/flock}$ | Parameter  |
| $Q_{12b}$ | <i>Fixed capital cost</i>         |                                                                                                                                                                                                                                                                        |            |
|           | Flock                             | 6.27 one/year                                                                                                                                                                                                                                                          | Own data   |
|           | Fixed assets                      | 746,990.64                                                                                                                                                                                                                                                             | Own data   |

|            |                             |                                       |                                                              |            |   |
|------------|-----------------------------|---------------------------------------|--------------------------------------------------------------|------------|---|
|            |                             | Interest rate =                       | 6 %yr                                                        | SELIC rate | j |
|            |                             | Fixed capital cost (FC) =             | (Fixed assets) * (Rate) / (Flocks)                           |            |   |
|            |                             |                                       | = (___R\$) * (___%) / (___flocks/year)                       |            |   |
|            |                             |                                       | = 7,148.24 R\$/flock                                         | Parameter  |   |
| $Q_{12c}$  | <i>Working capital cost</i> |                                       |                                                              |            |   |
|            | <i>Labor</i>                |                                       |                                                              |            |   |
| $Q_{3a}$   |                             | Registered manpower =                 | 3,497.06 R\$/flock                                           | Parameter  |   |
| $Q_{3a1}$  |                             | Payment per flock =                   | 13,313.70 R\$/flock                                          |            |   |
| $Q_{3b}$   |                             | Catching services =                   | 3,944.80 R\$/flock                                           | Parameter  |   |
| $Q_{3c}$   |                             | Technical assistance =                | 310.34 R\$/flock                                             | Parameter  |   |
|            | <i>Sanity</i>               |                                       |                                                              |            |   |
| $Q_{6a}$   |                             | Cleaning and sanitization =           | 172.24 R\$/flock                                             | Parameter  |   |
|            | <i>Energy drinks</i>        |                                       |                                                              |            |   |
| $Q_{7a}$   |                             | Heating =                             | 2,100.00 R\$/flock                                           | Parameter  |   |
| $Q_{7b}$   |                             | Fuel =                                | 308.02 R\$/flock                                             | Parameter  |   |
| $Q_{7c}$   |                             | Electricity =                         | 1,365.00 R\$/flock                                           | Parameter  |   |
|            | <i>Other costs</i>          |                                       |                                                              |            |   |
| $Q_{10}$   |                             | Transport =                           | 6,116.11 R\$/flock                                           | Parameter  |   |
| $Q_4$      |                             | Day-old chicks =                      | 12,800.00 R\$/flock                                          | Parameter  |   |
| $Q_5$      |                             | Nutrition =                           | 60,973.04 R\$/flock                                          | Parameter  |   |
| $Q_8$      |                             | Bedding =                             | 33.33 R\$/flock                                              | Parameter  |   |
| $Q_{2b}$   |                             | Maintenance =                         | 52.64 R\$/flock                                              | Parameter  |   |
| $Q_{11a}$  |                             | Miscellaneous cost - Producer =       | 77.68 R\$/flock                                              | Parameter  |   |
| $Q_{11b}$  |                             | Miscellaneous cost – Agribusiness =   | 2,404.38 R\$/flock                                           | Parameter  |   |
|            |                             | Interest rate =                       | 6 %                                                          | SELIC rate | j |
| $Q_{12ca}$ |                             | Working capital cost - Agribusiness = | $\sum_{i=7}^{11} (Q_{3a1,3b,3c,4,5,10,11b}) * (\text{Rate})$ |            |   |
|            |                             |                                       | = $\sum_{i=7}^{11} (\text{___R\$/flock}) * (\text{___}\%)$   |            |   |
|            |                             |                                       | = 5,837.75 R\$/flock                                         | Parameter  |   |

|            |                                                                                                                                                                             |           |
|------------|-----------------------------------------------------------------------------------------------------------------------------------------------------------------------------|-----------|
| $Q_{12cb}$ | Working capital cost - Producer = $\sum_{i=8}^1 (Q_{2b,3a,6a,7a,7b,7c,8,11a}) * (\text{Rate})$<br>= $\sum_{i=8}^1 (\text{R\$/flock}) * (\text{\%})$<br>= 1,134.76 R\$/flock | Parameter |
|            | Total cost with production factors = $(Q_{12a}) + (Q_{12b}) + (Q_{12c})$<br>= $(\text{R\$/flock}) + (\text{R\$/flock}) + (\text{R\$/flock})$<br>= 14,120.75 R\$/flock       | Parameter |

\*\* MEKONNEN, MM; HOEKSTRA, AY The green, blue and gray water footprint of farm animals and animal products. Delf, the Netherlands UNESCO-IHE, , 2010. Available at: <papers3://publication/uuid/2A0FDCDE-D1D0-43B0-8404-C512B986D8B0>.

<sup>a</sup> The residual rate (%) and useful life (years) of facilities and equipment were used according CONAB (2010). For the building, a residual rate of 20% and a useful life of 40 years were defined. For “rotavator” equipment, a residual rate of 5% and a useful life of 12 years were defined. For other equipments (i.e feeding, watering and air conditioning systems), the values for residual rate and useful life were defined from the median of a database with information on 340 agricultural implements listed by CONAB (2010), being defined in 5% and 12, respectively. The use of the median is justified for this purpose since the values present a high discrepancy between them, and the median may represent reality more reliably for this data set.

<sup>b</sup> MIELE, M.; ABREU, PG; ABREU, VMN; JENISCH, FRF; MARTINS, FM; MAZZUCO, H.; SANDI, AJ; SANTOS FILHO, JI; TREVISOL, IM 2010. Technical coefficients for calculating the cost of broiler chicken production. Technical release 483, Embrapa Birds and Pigs, p. 14.

<sup>c</sup> Payment by the agroindustry to the producer in exchange for the care of the birds;

<sup>d</sup> Pro-labore;

<sup>e</sup> 08 hours worked per week, 05 days worked per week and 04 weeks per month were considered, totaling 160 hours worked per month;

<sup>g</sup> Number of flocks produced until the bed was changed for a new one;

<sup>i</sup> SELIC rate at 6% per year in 2018 (in Basic Interest Rates – Historical. Available at: <https://www.bcb.gov.br/controleinflacao/historicotaxasjuros> ; accessed on: 2023. Considering 70% of the value of the basic interest rate applied in savings

Average Currency exchange rate: 1.00 USD: 3.65 BRL in 2018
